# Supplementary material for: Single-cell Spatial Proteomic Revelations on the Multiparametric MRI Heterogeneity of Clinically Significant Prostate Cancer
Source: Oxford University Press journal article supplement (doi:10.1158/1078-0432.ccr-20-4217), 2021-03-26
Supplement: 10780432ccr204217-sup-254507_2_supp_6914314_q4dfxy.docx [file 10780432ccr204217-sup-254507_2_supp_6914314_q4dfxy.docx]

| **Study ID** | **MRI status** | **RP Path** | **Grade** | **Tumor volume** | **Percent Pattern 4 Disease** | **Morphology Pattern 4** | **Tumor Stage/Nodal Stage** |
| --- | --- | --- | --- | --- | --- | --- | --- |
| 8392 | Negative | G7, 25% | Gleason 3+4 | 25% | 5% | cribiform, poorly formed | T2/N0 |
| 8393 | Negative | G7, 20% | Gleason 3+4 | 20% | 30% | poorly formed, cribiform, ductal, glomeruloid | T3a/N0 |
| 8394 | Negative | G7, 25% | Gleason 3+4 | 25% | 10% | poorly formed, glomeruloid, fusion | T2/N0 |
| 8395 | Negative | G7, 20% | Gleason 4+3 | 20% | 90% | cribiform, poorly formed, fusion | T3b/N0 |
| 8396 | Negative | G7, 5% | Gleason 4+3 | 5% | 45% | cribiform, fusion, glomeruloid | T2/N0 |
| 8397 | Negative | G7, 5% | Gleason 3+4 | 5% | 20% | poorly formed, fusion, cribiform | T2/N0 |
| 8398 | Negative | G7, 40% | Gleason 3+4 (5) | 40% | 10% | poorly formed, fusion | T3b/N0 |
| 8399 | Negative | G7, 5% | Gleason 3+4 | 5% | 20% | cribiform, glomeruloid | T2/N0 |
| 8400 | Positive | G7, 10% | Gleason 4+3 | 10% | 90% | ductal, cribiform, poorly formed | T3a/N0 |
| 8401 | Positive | G7, 10% | Gleason 3+4 | 10% | 20% | poorly formed, cribiform, fusion | T3b/N0 |
| 8402 | Positive | G7, 10% | Gleason 3+4 | 10% | 20% | poorly formed, cribiform, fusion | T2/N0 |
| 8403 | Positive | G7, 5% | Gleason 3+4 | 5% | 30% | poorly formed, cribiform | T3a/N0 |
| 8404 | Positive | G7, 30% | Gleason 3+4 | 30% | 10% | cribiform, glomeruloid, ductal | T3a/N1 |
| 8405 | Positive | G7, 15% | Gleason 4+3 | 15% | 70% | ductal, cribiform, fusion | T3b/N0 |
| 8406 | Positive | G7, 10% | Gleason 3+4 | 10% | 40% | glomeruloid, cribiform, poorly formed, ductal | T3a/N0 |
| 8407 | Positive | G7, 10% | Gleason 3+4 | 10% | 30% | cribiform, poorly formed, glomeruloid, fusion | T2/N0 |

**Supplementary Table S1. Clinicopathologic characteristics of each mpMRI-invisible and -visible PCa tumor.**
